# Supplementary material for: Taxonomy annotation and guide tree errors in 16S rRNA databases
Source: PeerJ. 2018 Jun 12;6:e5030. doi: 10.7717/peerj.5030 (PMC6003391; doi:10.7717/peerj.5030)
Supplement: Supplemental Information 2 — Complete list of the 46 taxon names placed into different parent taxa by Greengenes v13.5 and SILVA v128, considering only names present in both databases. [file peerj-06-5030-s002.xlsx]

## Sheet: Nomenclature conflicts
Taxon	Greengenes parent	SILVA parent	Example GG accession	Example SILVA accession
o:Haloplasmatales	c:Bacilli	c:Mollicutes	784950	AFNU02000027.3828.5341
f:Beutenbergiaceae	o:Actinomycetales	o:Micrococcales	857506	LC093421.1.1493
f:Bogoriellaceae	o:Actinomycetales	o:Micrococcales	1069794	JNFL01000172.3550.5091
f:Brevibacteriaceae	o:Actinomycetales	o:Micrococcales	1109545	JAJB01000072.80.1512
f:Cellulomonadaceae	o:Actinomycetales	o:Micrococcales	1110951	JAGF01000001.4097937.4099438
f:Dermabacteraceae	o:Actinomycetales	o:Micrococcales	1110192	GEGL01048439.1.1253
f:Dermacoccaceae	o:Actinomycetales	o:Micrococcales	1071851	LVCF01000017.3956.5493
f:Dermatophilaceae	o:Actinomycetales	o:Micrococcales	806341	BAGZ01000028.3708.5222
f:Francisellaceae	o:Legionellales	o:Thiotrichales	1105124	JUJU01000001.877269.878782
f:Hyphomonadaceae	o:Rhodobacterales	o:Caulobacterales	1110665	AWFD01000036.85975.87434
f:Intrasporangiaceae	o:Actinomycetales	o:Micrococcales	1111460	LQZG01000006.249.1779
f:Jonesiaceae	o:Actinomycetales	o:Micrococcales	592149	HM240267.1.1342
f:Microbacteriaceae	o:Actinomycetales	o:Micrococcales	1111778	CBVQ010000169.16978.18487
f:Micrococcaceae	o:Actinomycetales	o:Micrococcales	1111560	GBRU01060255.1.1402
f:Promicromonosporaceae	o:Actinomycetales	o:Micrococcales	1109758	JAGJ01000045.40.1540
f:Pseudoalteromonadaceae	o:Vibrionales	o:Alteromonadales	1110811	GDKH01001869.74.1591
f:Rarobacteraceae	o:Actinomycetales	o:Micrococcales	573103	AB056127.1.1503
f:Ruaniaceae	o:Actinomycetales	o:Micrococcales	1035832	ATWL01000047.929.2440
f:Sanguibacteraceae	o:Actinomycetales	o:Micrococcales	1103633	BCRT01000028.282.1785
g:Alkalibacterium	f:Aerococcaceae	f:Carnobacteriaceae	817700	JANL01000017.218.1701
g:Alloiococcus	f:Aerococcaceae	f:Carnobacteriaceae	1104320	AGXA01000018.94315.95851
g:Anaerospora	f:Rhodobacteraceae	f:Veillonellaceae	1063320	AY372050.1.1517
g:Asteroleplasma	f:Anaeroplasmataceae	f:Erysipelotrichaceae	832731	M22351.1.1470
g:Blastochloris	f:Xanthobacteraceae	f:Hyphomicrobiaceae	818057	AB033757.1.1409
g:Cupriavidus	f:Oxalobacteraceae	f:Burkholderiaceae	1105554	LQAD01000035.3666.5194
g:Flexibacter	f:Flammeovirgaceae	f:Cytophagaceae	58632	JFJP01058804.839.2293
g:Friedmanniella	f:Nocardioidaceae	f:Propionibacteriaceae	1098598	LC113905.1.1461
g:Gluconacetobacter	f:Enterobacteriaceae	f:Acetobacteraceae	1106984	LC103263.1.1424
g:Hydrogenophilus	f:Rhodocyclaceae	f:Hydrogenophilaceae	1098449	JN701185.1.1335
g:Jiangella	f:Pseudonocardiaceae	f:Propionibacteriaceae	806031	AZXT01000005.1402181.1403683
g:Kytococcus	f:Intrasporangiaceae	f:Dermacoccaceae	1078695	JN644569.1.1471
g:Limnobacter	f:Comamonadaceae	f:Burkholderiaceae	1108895	CEPZ01017394.1846.3158
g:Marinilactibacillus	f:Aerococcaceae	f:Carnobacteriaceae	1107549	CENZ01043687.1.1346
g:Microbispora	f:Micrococcaceae	f:Streptosporangiaceae	1109847	JNZM01002418.129.1629
g:Mycoplana	f:Caulobacteraceae	f:Brucellaceae	1110667	GQ199732.1.1385
g:Parvibaculum	f:Hyphomicrobiaceae	f:Rhodobiaceae	917851	AY387398.1.1451
g:Polynucleobacter	f:Oxalobacteraceae	f:Burkholderiaceae	1111830	LOJI01000001.323205.324717
g:Propionicimonas	f:Nocardioidaceae	f:Propionibacteriaceae	1100685	LC132816.1.1414
g:Ralstonia	f:Oxalobacteraceae	f:Burkholderiaceae	1107890	ACUF01000076.437.1962
g:Reinekea	f:Saccharospirillaceae	f:Oceanospirillaceae	778594	AAOE01000002.197017.198545
g:Rhodobium	f:Hyphomicrobiaceae	f:Rhodobiaceae	593947	LC110383.1.1408
g:Salinispora	f:Burkholderiaceae	f:Micromonosporaceae	833544	JAEY01000069.185.1680
g:Thalassospira	f:Kiloniellaceae	f:Rhodospirillaceae	942823	JRJE01000018.3816.5290
g:Thermobispora	f:Pseudonocardiaceae	f:Thermomonosporaceae	689814	LAXD01000001.1978340.1979972
g:Ureibacillus	f:Planococcaceae	f:Bacillaceae	1035198	AB101594.1.1540
g:Wolbachia	f:Rickettsiaceae	f:Anaplasmataceae	1111183	GAPE01032969.81.1542
